# Supplementary material
Source: PubMed Central journal article supplement (PMC4256759)
Supplement: 00cf4499fe821160d0f7455bfac5f402_genetics.114.171538-14.pdf [file 00cf4499fe821160d0f7455bfac5f402_genetics.114.171538-14.pdf]

**Table S4.** Proportion of observed within-host pairwise distances rejected at the 5% level, under the assumption that HCW infection occurred 2 days after the infection time of the patient. Proportions were calculated under both the geometric-Poisson and the pure Poisson approximations.

| Source of HCW infection | Proportion of within-host pairwise distances rejected at 5% level |         |
|-------------------------|-------------------------------------------------------------------|---------|
|                         | Geometric-Poisson                                                 | Poisson |
| Patients 1-6            | 0.16                                                              | 0.48    |
| Patients 7-14           | 0.25                                                              | 0.48    |
| Patients 15             | 0.35                                                              | 0.48    |
