# Supplementary material
Source: PubMed Central journal article supplement (PMC4256759)
Supplement: 3fe3a1896f9970465894a62e250b2040_genetics.114.171538-13.pdf [file 3fe3a1896f9970465894a62e250b2040_genetics.114.171538-13.pdf]

## File S1

### **1. Estimation of parameters**

While the Geometric-Poisson distribution appears to approximate the distance distribution under simulation well, this is under the assumption that several key parameters of interest are known – namely, the mutation rate, the equilibrium effective population size within-host, and the bottleneck size. With a known transmission structure (for instance, within a household (COWLING *et al.* 2010)), it is possible to estimate some of these quantities. We simulated an outbreak and assumed that a set of 25 transmission pairs was observed. Figure S8 shows the likelihood of these data under a range of values for mutation rate and effective population size. The estimate of the effective population size is uncertain, since the data are less informative of this parameter; in the most extreme case, where coalescence occurs immediately prior to the time of lineage divergence, the likelihood function depends only on the mutation rate.

The bottleneck size can additionally be estimated. Observation of multiple genotypes shortly after a bottleneck event suggests that the bottleneck must be large enough to allow diversity through; Figure S9 shows the likelihood of observing different numbers of SNPs within host shortly after transmission, for a range of potential bottleneck sizes. Again, such estimates are associated with very high levels of uncertainty, particularly for large bottleneck sizes. However, it may be possible to test the hypothesis that the bottleneck size is strict, an assumption frequently made in transmission network reconstruction methods.

### **2. Simulated outbreak**

Figure S2 shows a simulated SIR outbreak with 25 infected individuals, 18 of which have a sampled genotype. We considered the relative likelihood of observing a genetic distance between two hosts, given direct transmission has occurred (Figure S2, bottom left). The maximum likelihood estimate of transmission source was correct in eight out of 17 transmission events. In comparison, selecting the genetically closest isolate as the source was correct in seven cases, although for some of these, multiple hosts were equally close.

For any given infected host, a genetic distance threshold may be specified, which may be used to rule out direct transmission to a given probability level. Consider the individual labelled 'N' in figure S2, with a sample at time 1000. Under the geometric-Poisson approximation with strict bottleneck, the probability of drawing a sample differing by 4 SNPs or greater at time 1000 from the true host is less than 5%. As such, six of the eleven previously infected individuals can be ruled out as transmission sources at this level. As the time between samples and/or the bottleneck size increase, this threshold also increases.

### **3. Comparison with transmission network estimation software packages.**

'*Outbreaker*' is an R package for the investigation of individual-level transmission dynamics using genomic data (JOMBART *et al.* 2014), while '*seqTrack*' is an earlier and simpler method, implemented in the '*adegenet*' package (JOMBART *et al.* 2011). These software packages are arguably the most accessible tools for estimating a transmission network available at present, and as such, we wanted to compare their performance against our method. Given a user-specified infectivity distribution and one genomic sample per infected host, *outbreaker* implements an MCMC

algorithm which estimates the posterior edge probabilities of the network, along with several parameters of interest, including the mutation rate. Unlike our model, this approach therefore does not require infection times and mutation rate to be known (and can also be used to detect importations into a population), however, it operates on a less sophisticated model of within-host dynamics – mutations are assumed to be a feature of transmission, and an infected host is adequately represented by a single sequenced pathogen isolate. *seqTrack* identifies the genetically closest pathogen sample as the source, using the specified mutation rate to break ties. This approach also assumes that each host is represented by one genomic sample.

We simulated outbreaks under various assumptions, and attempted to identify the transmission network using our likelihood approach, as well as the *outbreaker* and *seqTrack* functions. While the *outbreaker* package can also be used to simulate outbreaks, this is performed under the assumptions mentioned previously, so we instead simulated the within-host pathogen dynamics explicitly, as described in *Methods*. We used the number of transmission routes to compare the two methods. We ran *outbreaker* with no spatial model, and detection of importations suppressed. Furthermore, we assumed a flat infectivity distribution. We emphasize that these approaches are not directly comparable, since *outbreaker* and *seqTrack* accommodate unknown infection times, and *outbreaker* furthermore estimates the mutation rate, giving our approach an advantage in this comparison. Results are presented in Table S2.

#### **4. MRSA outbreak analysis**

While the analysis provided in the main text provides estimates of transmission routes under plausible parameter values found in the literature, there is a great deal of uncertainty surrounding true within-host pathogen population dynamics, and as such, we repeated the analysis under a range of assumptions. The mutation rate used in the main analysis was given in the paper describing this dataset; the mutation rate of MRSA has previously been estimated to be higher ( $3 \times 10^{-6}$  per nucleotide per year, equivalent to  $5 \times 10^{-4}$  per genome per generation (HARRIS *et al.* 2010; YOUNG *et al.* 2012)), so we repeated the analysis with this value. With this higher mutation rate, a larger range of genetic distances are plausible, and as such, fewer routes were excluded at the 5% level. The HCW was a plausible source for most patients on the ward, however, the genetic distance from patients 1 and 5 to the HCW were more similar than would be expected, given this infection route. No patient to HCW transmission route could be excluded at the 5% level.

Changing the effective population size had a limited effect on the estimated transmission route estimates. Values of 2000 and higher produced near identical posterior probabilities. Previous studies have estimated nasal carriage of *S. aureus* to have an effective population size in the range of 50-4000 (YOUNG *et al.* 2012; GOLUBCHIK *et al.* 2013). We experimented with an effective population size of 100, finding that five patient-HCW routes, and seven HCW-patient routes could be excluded at the 5% level.

Varying the time at which the HCW became infected had an impact on posterior transmission probabilities. Moving this value forward in time decreases the number of SNPs expected to accumulate by the time of observation. If the HCW infection time was 164 days after the first case, the upper bound of the range provided by (HARRIS *et al.* 2013), five patients remain temporally consistent with having become infected by the HCW. Two of these transmission routes can be excluded at the 5% level.

We repeated our analysis using the pure Poisson model. In general, this distribution has a shorter right tail than the geometric-Poisson distribution, and as such, can lead to more transmission routes being rejected at a given probability level. With the same assumptions as in the main text, the HCW-patient routes were typically given a higher posterior probability under the Poisson distribution, however, the most likely source of infection remained the same for all individuals (Figure S5).

### 5. Conditional distributions

We define a phylogenetic subtree to be the unique set of branch segments linking two isolates, originating at the time of their coalescence. Then the genetic distance  $\Psi(g_1, g_2)$  is dependent on another distance  $\Psi(g_3, g_4)$  by the intersection of the two phylogenetic subtrees. The conditional distribution of one genetic distance given another is

$$\Psi(g_1, g_2) | \Psi(g_3, g_4) \sim \text{Bin}\left(\Psi(g_3, g_4), \frac{\text{length of intersection}}{\text{length of subtree}(g_3, g_4)}\right) + \text{Pois}\{\mu((\text{length of subtree}(g_1, g_2)) - (\text{length of intersection}))\} \quad (8)$$

Figure S7 shows two possible configurations of the phylogenetic and transmission tree with three infected cases. In both settings,  $\Psi(g_2, g_3)$  depends on  $\Psi(g_1, g_2)$  via the mutations occurring along branch  $b_3$ . If the sequences at the internal nodes are known, or can be inferred, this estimation is unnecessary, as the true number of mutations along any given branch segment can be calculated. However, since the genealogy is not typically observed, and does not necessarily correspond to the transmission network, even under a strict bottleneck (PYBUS and RAMBAUT 2009; YPMA *et al.* 2013), such an approximation may be useful for inference of the full network, and to account for multiple samples per host.

Transmission chains of length 3 were simulated to investigate conditional distributions of genetic distances. Times from infection to sampling and onward transmission were identical for all cases. With a strict bottleneck,  $\Psi(g_2, g_3)$  varies only minimally with  $\Psi(g_1, g_2)$ , but  $\Psi(g_1, g_3)$  shows a clear dependency. Both distances increase with greater values of  $\Psi(g_1, g_2)$  under larger bottlenecks (Figure S6). With a strict bottleneck, the scenario in Figure S7B is impossible, and as such, the intersection of subtrees  $(g_1, g_2)$  and  $(g_2, g_3)$  is relatively small. With an increasing bottleneck size, the probability of scenario B, and therefore the potential length of subtree overlap, increases.

## References

- COWLING, B. J., K. H. CHAN, V. J. FANG, L. L. H. LAU, H. C. SO *et al.*, 2010 Comparative Epidemiology of Pandemic and Seasonal Influenza A in Households. *New England Journal of Medicine* 362: 2175-2184.
- GOLUBCHIK, T., E. M. BATTY, R. R. MILLER, H. FARR, B. C. YOUNG *et al.*, 2013 Within-Host Evolution of *Staphylococcus aureus* during Asymptomatic Carriage. *PLoS One* 8: e61319.
- HARRIS, S. R., E. J. P. CARTWRIGHT, M. E. TÖRÖK, M. T. G. HOLDEN, N. M. BROWN *et al.*, 2013 Whole-genome sequencing for analysis of an outbreak of meticillin-resistant *Staphylococcus aureus*: a descriptive study. *Lancet Infectious Diseases* 13: 130-136.
- HARRIS, S. R., E. J. FEIL, M. T. G. HOLDEN, M. A. QUAIL, E. K. NICKERSON *et al.*, 2010 Evolution of MRSA during hospital transmission and intercontinental spread. *Science* 327: 469-474.
- JOMBART, T., A. CORI, X. DIDELOT, S. CAUCHEMEZ, C. FRASER *et al.*, 2014 Bayesian Reconstruction of Disease Outbreaks by Combining Epidemiologic and Genomic Data. *PLoS Computational Biology* 10: e1003457.
- JOMBART, T., R. M. EGGO, P. J. DODD and F. BALLOUX, 2011 Reconstructing disease outbreaks from genetic data: a graph approach. *Heredity* 106: 383-390.
- PYBUS, O. G., and A. RAMBAUT, 2009 Evolutionary analysis of the dynamics of viral infectious disease. *Nature Reviews Genetics* 10: 540-550.
- YOUNG, B. C., T. GOLUBCHIK, E. M. BATTY, R. FUNG, H. LARNER-SVENSSON *et al.*, 2012 Evolutionary dynamics of *Staphylococcus aureus* during progression from carriage to disease. *PNAS* 109: 4550-4555.
- YPMA, R. J. F., W. M. VAN BALLEGOIJEN and J. WALLINGA, 2013 Relating phylogenetic trees to transmission trees of infectious disease outbreaks. *Genetics* 195: 1055-1062.

## SI Figures

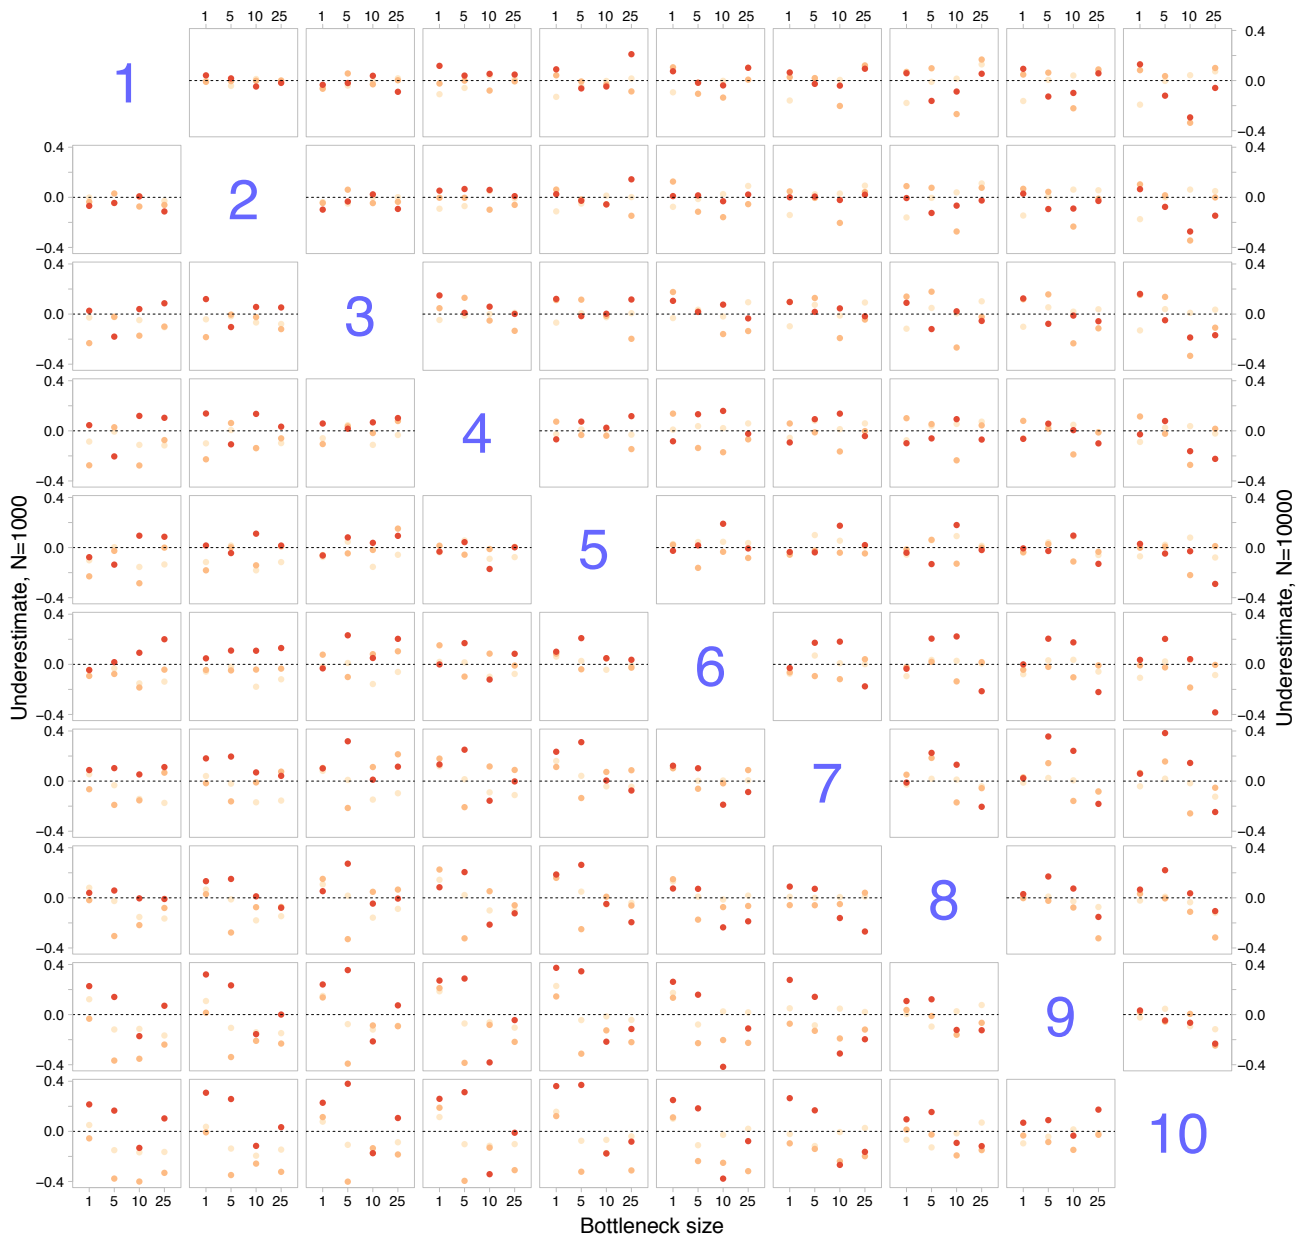

**Figure S1.** Differences between empirical and estimated pairwise genetic distances using the Geometric-Poisson approximation. The  $(i, j)$  th plot shows the difference between the empirical and simulated mean distance between samples taken from individuals  $i$  and  $j$ . Each plot shows the underestimate for various levels of bottleneck size and mutation rate (light, medium and dark points denote  $1 \times 10^{-4}$ ,  $3 \times 10^{-4}$ , and  $5 \times 10^{-4}$  respectively). Plots above the diagonal show underestimates for equilibrium population size 10000, while below the diagonal,  $N_{eq}=1000$ .

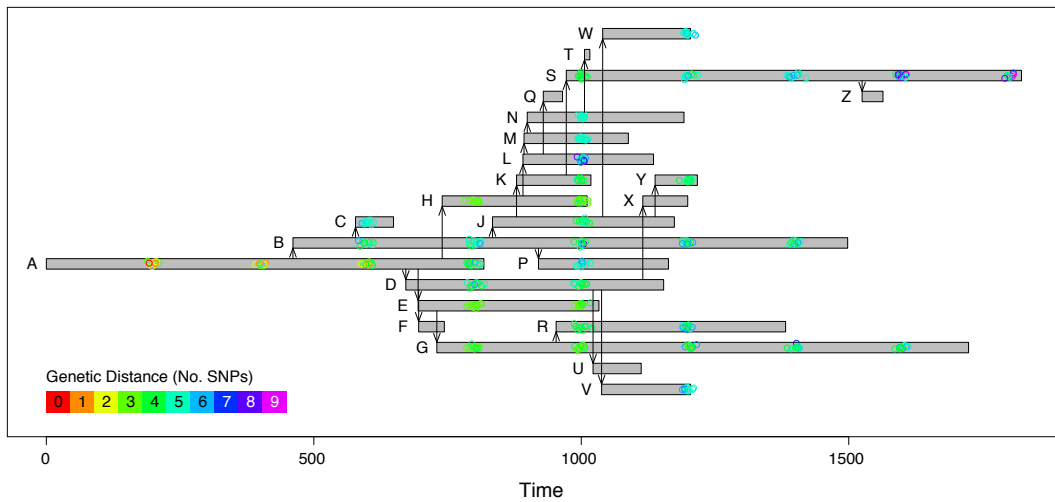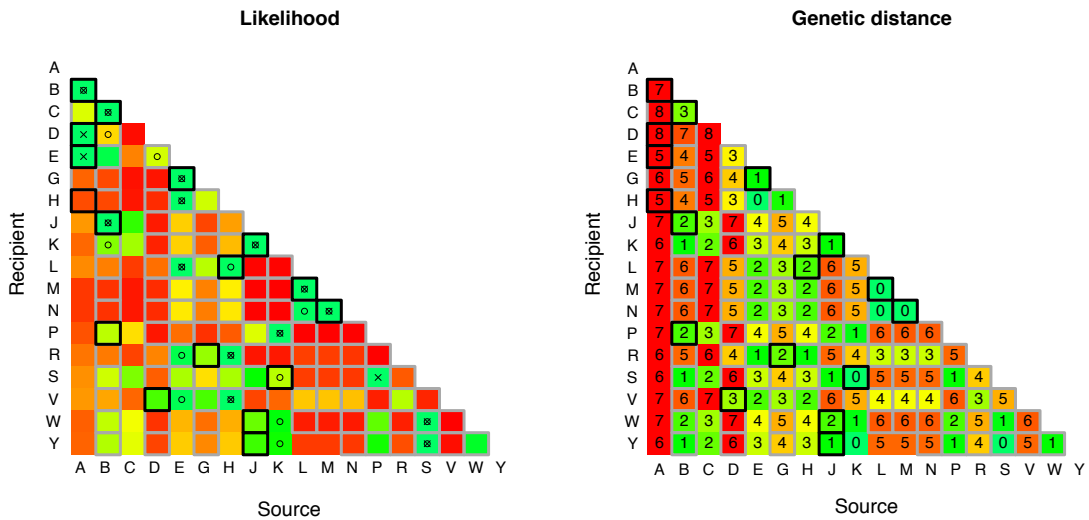

**Figure S2.** A simulated outbreak. 24 individuals are infected in a simulated SIR outbreak, of which 18 have sampled genotypes. Each individual has an infectious period shown as a gray bar, with genotypes shown as colored circles, the color denoting the genetic distance from the first sample (top). One randomly sampled genome for each individual is used to assess the likelihood of direct transmission from each other sampled individual. The pairwise genetic distances are shown (bottom right), with black boxes denoting the true source of infection, and gray boxes denoting presence at the time of infection. The relative likelihood of direct transmission using the geometric-Poisson approximation is shown for each pair (bottom left, green and red indicating high and low relative likelihood respectively). Crosses indicate the maximum likelihood estimate, while circles indicate the genetically closest isolate to each sample.

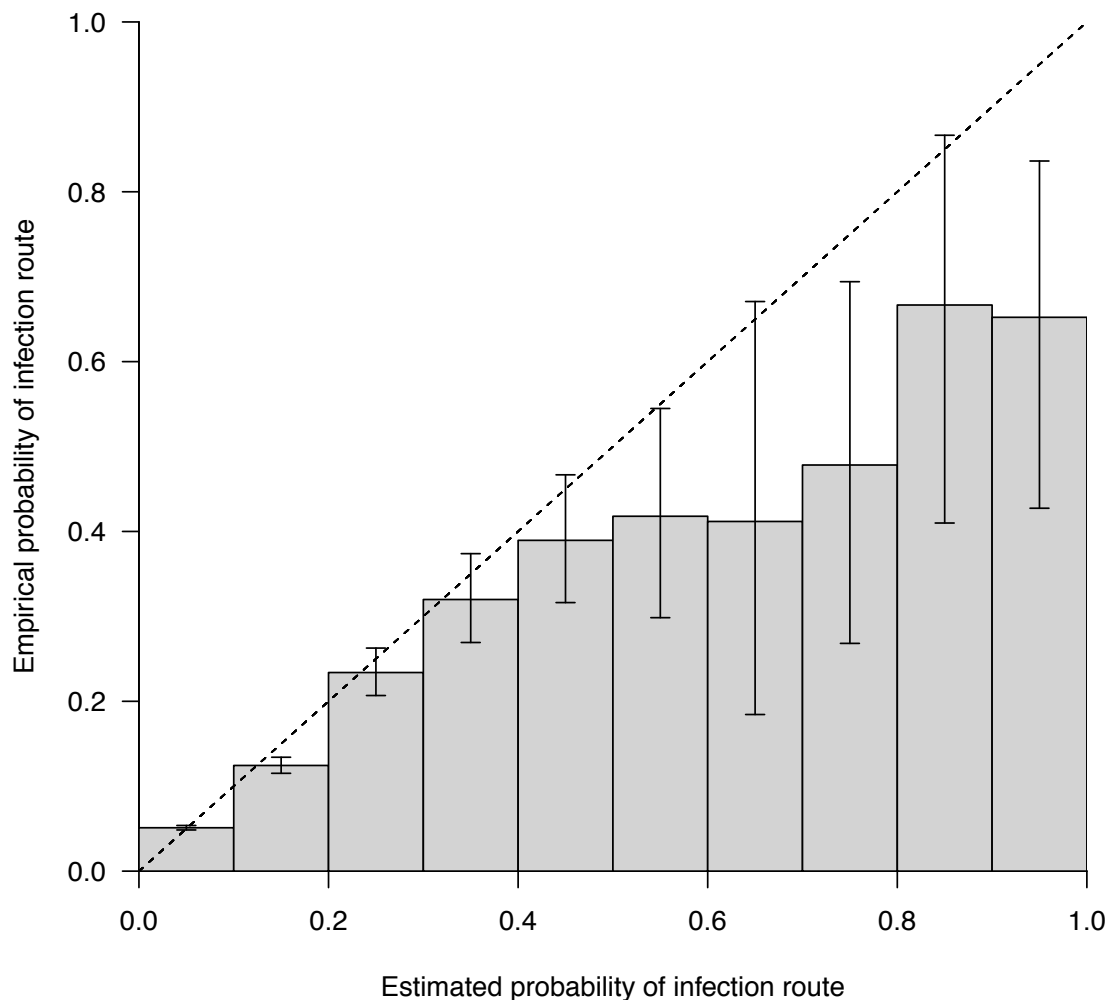

**Figure S3.** The empirical probability that a proposed transmission route correct for a range of posterior probabilities calculated under the geometric-Poisson assumption. A total of 100 outbreaks were simulated with a bottleneck size of 5; transmission events prior to the host were assumed to occur at intervals equal to the mean generation interval. The posterior probability of direct transmission was calculated for every pair of infected individuals. Counts were collated into 10% probability bins and for each, the proportion of true transmission routes calculated. Error bars depict the 95% exact binomial confidence interval.

## Inferred transmission network, including HCW

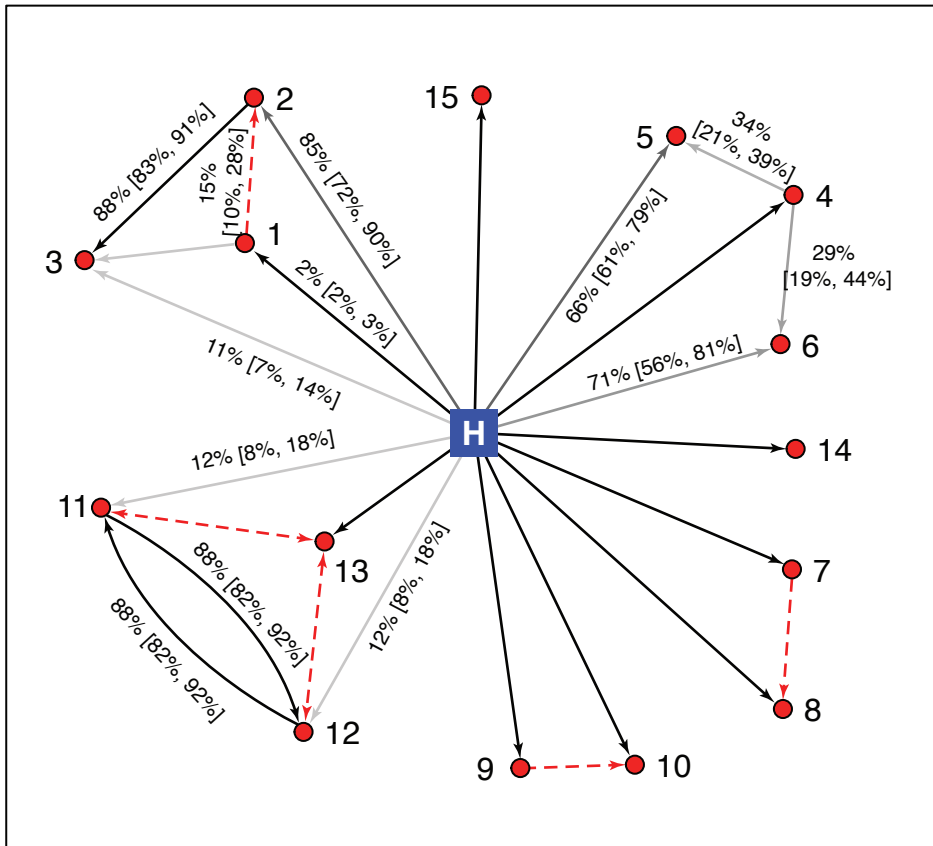

**Figure S4.** Transmission network in the SCBU, using each HCW isolate individually. HCW is shown as a blue square, potential transmission routes are shown as arrows. Red dashed arrows denote transmission routes rejected at the 5% level using the geometric-Poisson approximation. For each of the 20 HCW isolates, posterior transmission probabilities were calculated individually, and the mean and range of values are indicated on the plot.



### Inferred transmission network, including HCW

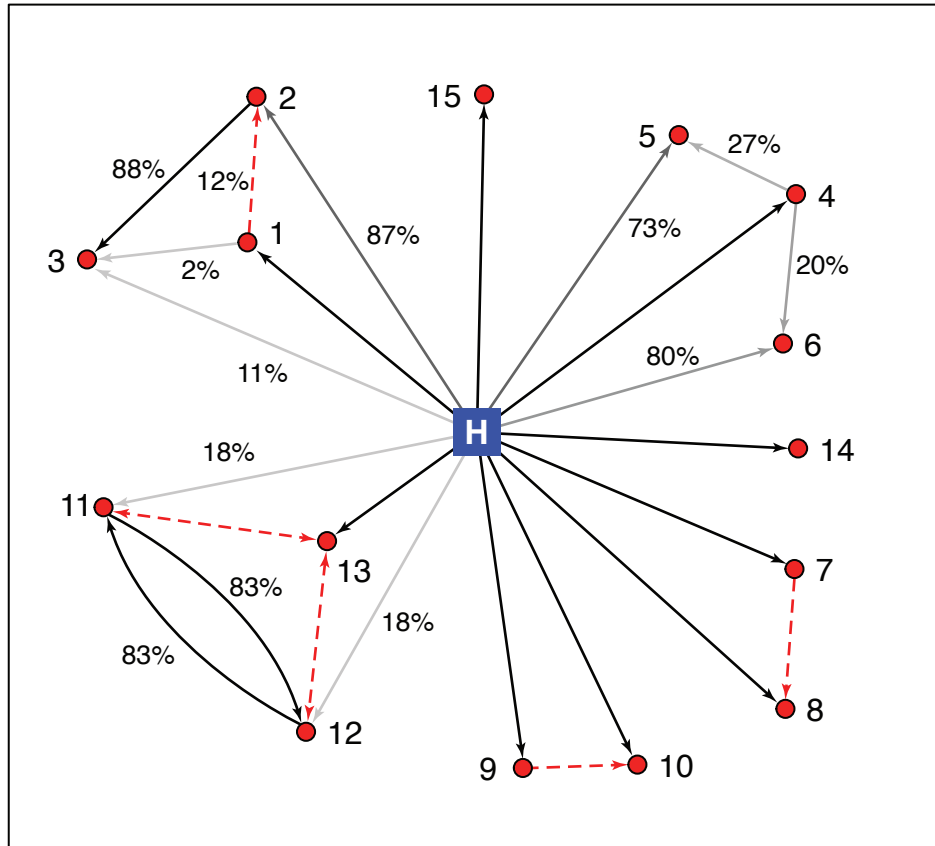

**Figure S5.** Transmission network in the SCBU, using the pure Poisson approximation. HCW is shown as a blue square, potential transmission routes are shown as arrows. Red dashed arrows denote transmission routes rejected at the 5% level using the Poisson approximation.

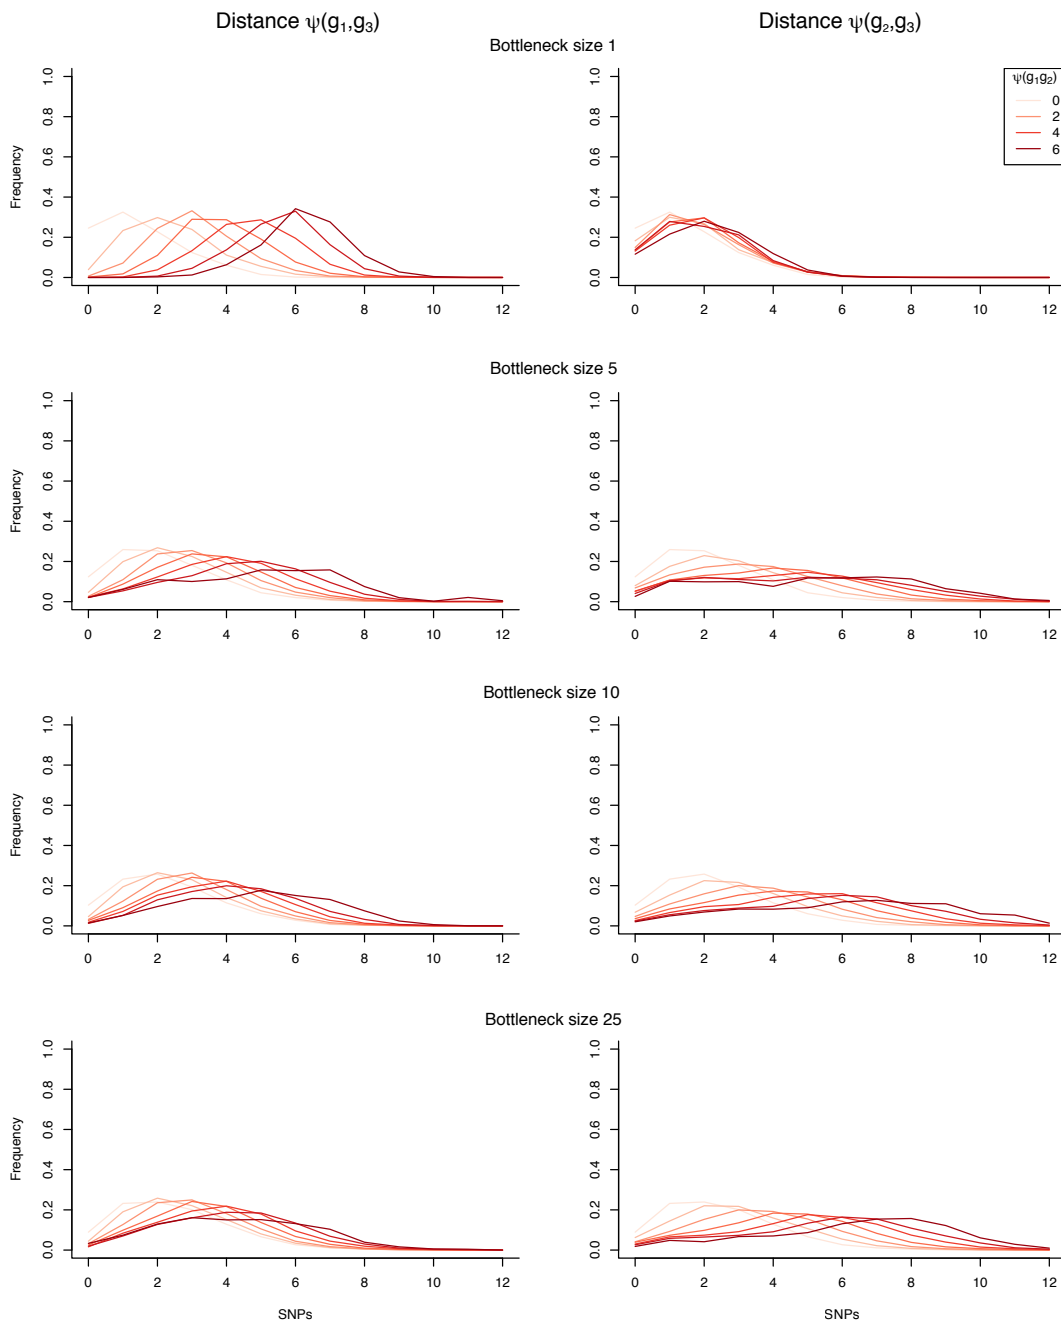

**Figure S6.** Simulated conditional distributions of genetic distances arising from a transmission chain of length 3. Each row shows plots for  $\psi(g_1, g_3)$  and  $\psi(g_2, g_3)$  given various levels of  $\psi(g_1, g_2)$  (denoted by different colors). Bottleneck size varies by row. Equilibrium size was set to 10000, and mutation rate  $\mu = 3 \times 10^{-4}$ .

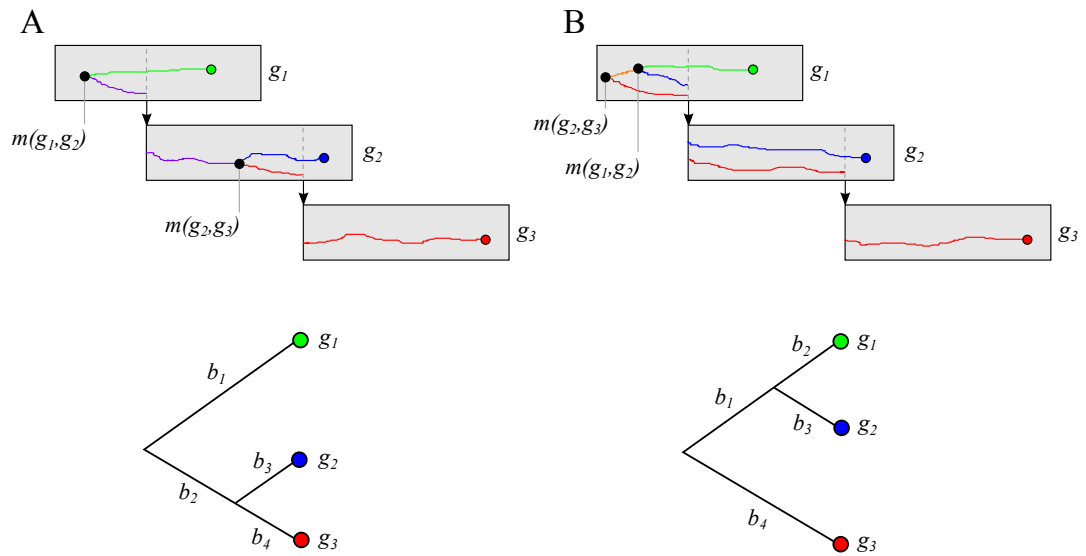

**Figure S7.** Two possible phylogenetic configurations in a transmission chain of length 3. (A) Lineages  $g_2$  and  $g_3$  coalesce within host 2. (B) Lineages  $g_2$  and  $g_3$  coalesce within host 1, prior to the coalescence of  $g_1$  and  $g_2$ . This configuration is possible only with a bottleneck of size  $> 1$ .

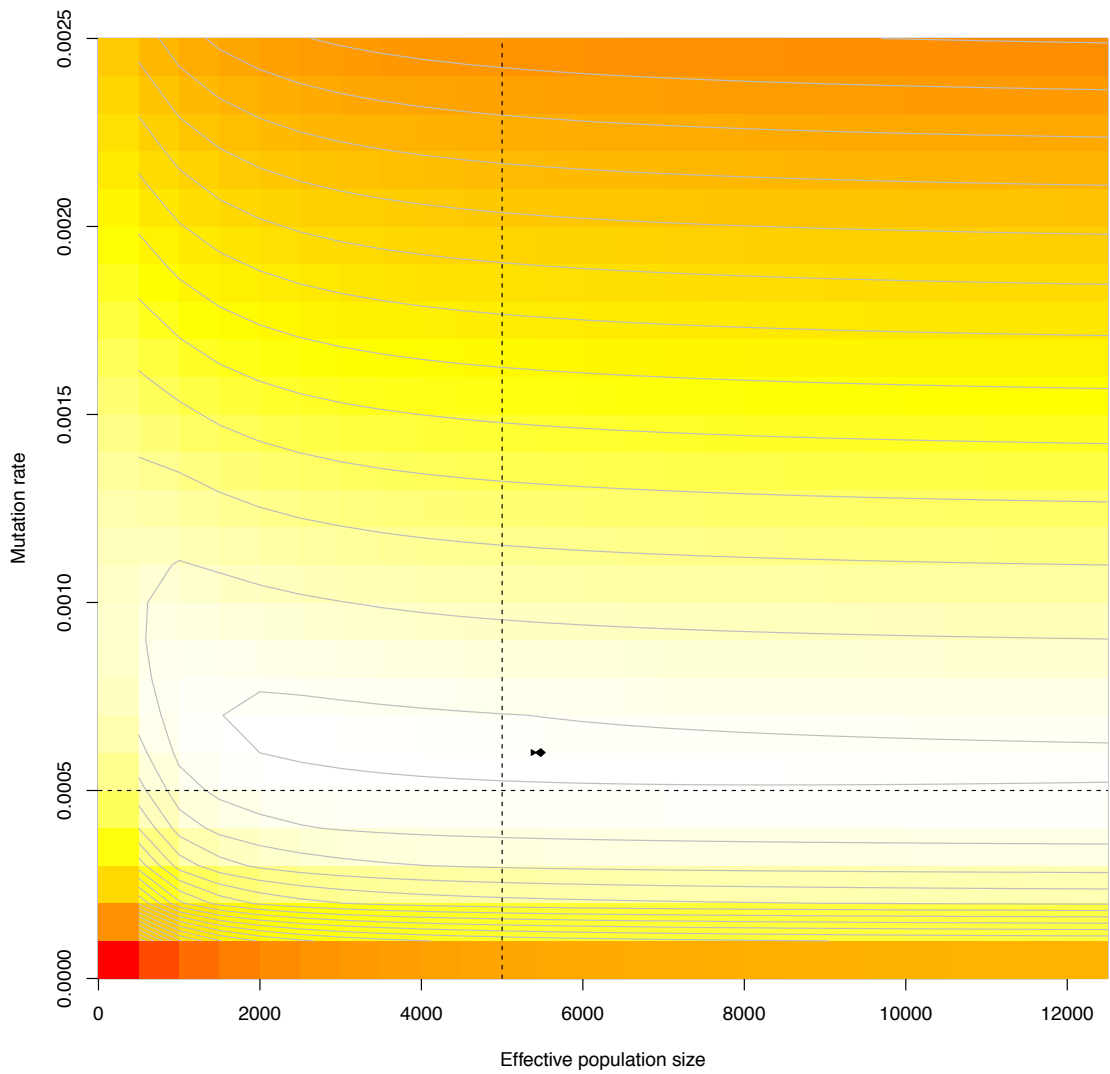

**Figure S8.** Likelihood of observing 28 pairwise genetic distances between known transmission pairs, given a range of values for the mutation rate and the effective population size. The dashed lines indicate parameter values under which the data were simulated, and the geometric-Poisson maximum likelihood value is marked. Maximum likelihood value calculated using the Nelder-Mead method in the ‘optim’ function in R.

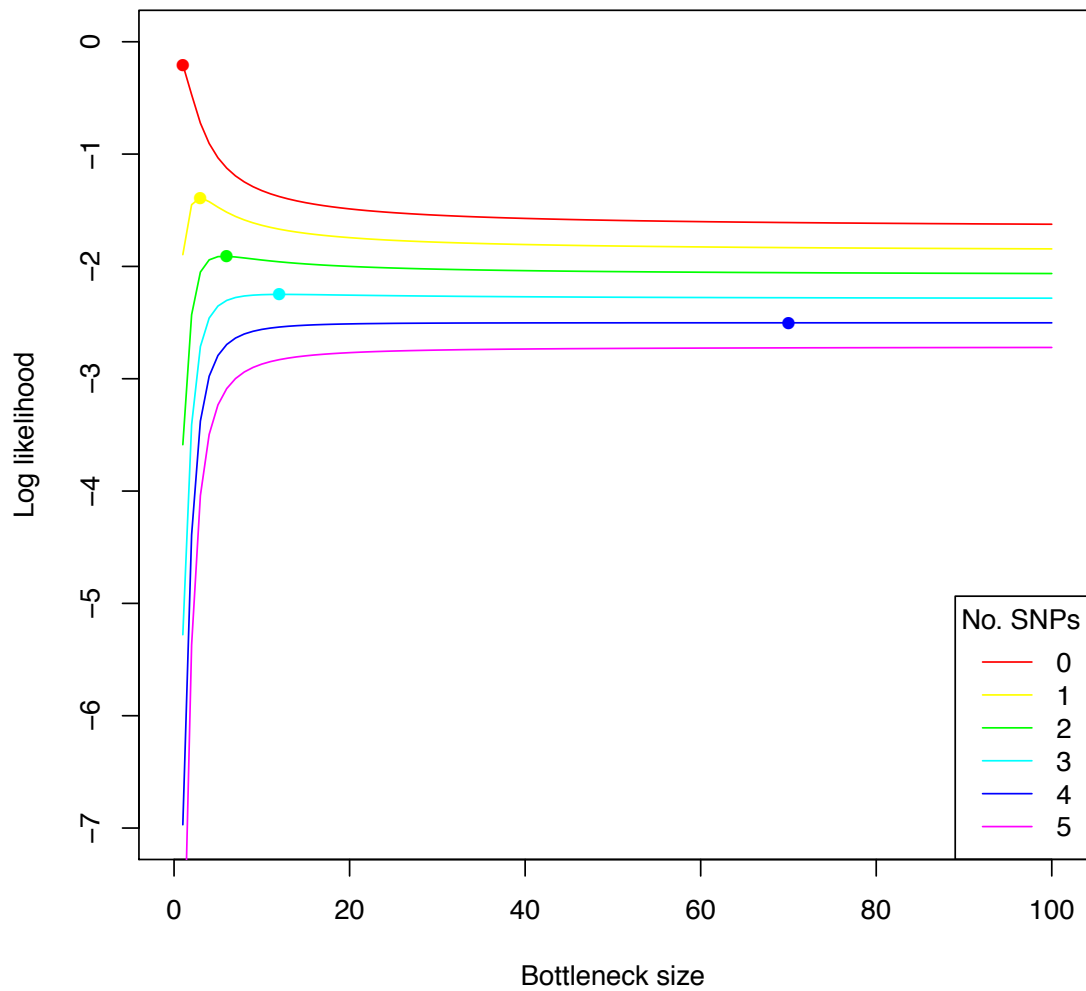

**Figure S9.** Likelihood curves for various within-host genetic distance observations, given a range of transmission bottleneck sizes. The effective population size and mutation rate are assumed to be known. The likelihood is calculated assuming samples are taken 50 generations after a transmission event; the maximum likelihood estimate of bottleneck size for each genetic distance is marked as a filled circle.

## SI Tables

**Table S1.** The differences between approximated and empirical distributions for within-host genetic distances. For a range of  $\mu N_{eq}$  and times since clonal infection, Akaike's Information Criterion (AIC) is given for both the geometric-Poisson (GP) and the Poisson (P) approximation. 250 simulated pathogen populations were generated, and for each, 1000 pairwise distances were recorded at each of the sample times. Cells are shaded according to the lower AIC value – red for Poisson, green for geometric-Poisson. The mutation rate was 0.001 per genome per generation.

|                             |       | Effective population size, $N_{eq}$ |                         |                         |                          |                         |                         |
|-----------------------------|-------|-------------------------------------|-------------------------|-------------------------|--------------------------|-------------------------|-------------------------|
|                             |       | 500                                 | 1000                    | 2500                    | 5000                     | 7500                    | 10000                   |
| Time since clonal infection | 50    | GP: 75341<br>P: 75216               | GP: 80764<br>P: 80334   | GP: 80729<br>P: 80462   | GP: 80734<br>P: 80431    | GP: 78318<br>P: 78008   | GP: 84445<br>P: 84162   |
|                             | 100   | GP: 115043<br>P: 114067             | GP: 128371<br>P: 126955 | GP: 131869<br>P: 130751 | GP: 133561<br>P: 132260  | GP: 129586<br>P: 128358 | GP: 133905<br>P: 132656 |
|                             | 500   | GP: 258951<br>P: 257189             | GP: 297052<br>P: 291320 | GP: 323116<br>P: 310162 | GP: 343677<br>P: 324330  | GP: 336449<br>P: 319142 | GP: 340266<br>P: 322343 |
|                             | 1000  | GP: 324557<br>P: 336776             | GP: 384288<br>P: 386824 | GP: 442356<br>P: 421016 | GP: 455690<br>P: 421886  | GP: 459908<br>P: 422279 | GP: 464791<br>P: 424528 |
|                             | 2500  | GP: 340205<br>P: 360382             | GP: 455889<br>P: 499865 | GP: 559643<br>P: 591170 | GP: 616431<br>P: 602032  | GP: 640539<br>P: 601454 | GP: 648459<br>P: 583515 |
|                             | 5000  | GP: 355353<br>P: 384607             | GP: 470566<br>P: 555942 | GP: 629747<br>P: 772276 | GP: 730920<br>P: 844597  | GP: 758704<br>P: 821443 | GP: 781885<br>P: 804054 |
|                             | 7500  | GP: 351289<br>P: 384044             | GP: 489139<br>P: 599342 | GP: 656489<br>P: 870263 | GP: 755024<br>P: 994202  | GP: 785749<br>P: 986565 | GP: 801616<br>P: 947202 |
|                             | 10000 | GP: 349955<br>P: 380901             | GP: 477976<br>P: 567623 | GP: 655821<br>P: 898879 | GP: 708001<br>P: 1001501 | GP: 708912<br>P: 984256 | GP: 692577<br>P: 942683 |

**Table S2.** Proportion of true transmission routes identified by both maximum likelihood (ML) and genetic similarity. SIR outbreaks with 30 initial susceptibles were simulated and a single genome sample was generated for each infective. For scenarios with bottleneck size >1, it was assumed that transmission events prior to the infection of the source occurred at intervals equal to the mean generation interval. Simulations with a final size <20 were discarded. For each infective, the maximum likelihood source was calculated under the geometric-Poisson approximation, and the genetically closest hosts selected. Simulations for each scenario were repeated 100 times. Baseline parameters: infection rate 0.002, removal rate 0.001, effective population size 5000.

| Mutation rate ( $\times 10^{-4}$ )            | 1               |      |      | 3    |      |      | 5    |      |      |
|-----------------------------------------------|-----------------|------|------|------|------|------|------|------|------|
|                                               | Bottleneck size | 1    | 5    | 25   | 1    | 5    | 25   | 1    | 5    |
| Prop. routes identified by ML                 | 0.27            | 0.21 | 0.21 | 0.32 | 0.23 | 0.22 | 0.33 | 0.24 | 0.21 |
| Prop. routes identified by genetic similarity | 0.19            | 0.17 | 0.15 | 0.27 | 0.20 | 0.18 | 0.29 | 0.22 | 0.19 |

**Table S3.** Proportion of correct transmission routes identified using the geometric Poisson likelihood, as well as with the ‘outbreaker’ and ‘seqTrack’ functions. A total of 25 outbreaks with 30 susceptible individuals were simulated for each scenario, with outbreaks terminating with fewer than 20 infections excluded.  $R_0$  was set to be 2, with a within-population size 5000. In outbreaker, no spatial model was defined, importation identification was suppressed, and the infectivity distribution was specified to be uniform. In seqTrack, the mutation rate was provided.

<sup>a</sup> If the true source and other hosts are genetically equidistant, the true host is assumed to be identified with probability  $1/(\# \text{ equidistant closest hosts})$ .

| Parameters    |               | Network identification method |            |          |                               |
|---------------|---------------|-------------------------------|------------|----------|-------------------------------|
| Mutation rate | Inoculum size | ML estimate                   | outbreaker | seqTrack | Closest genotype <sup>a</sup> |
| 0.002         | 1             | 0.28                          | 0.20       | 0.14     | 0.21                          |
| 0.002         | 5             | 0.26                          | 0.19       | 0.13     | 0.17                          |
| 0.002         | 10            | 0.24                          | 0.19       | 0.14     | 0.16                          |
| 0.005         | 1             | 0.28                          | 0.20       | 0.13     | 0.22                          |
| 0.005         | 5             | 0.22                          | 0.18       | 0.12     | 0.18                          |
| 0.005         | 10            | 0.21                          | 0.21       | 0.13     | 0.17                          |



**Table S4.** Proportion of observed within-host pairwise distances rejected at the 5% level, under the assumption that HCW infection occurred 2 days after the infection time of the patient. Proportions were calculated under both the geometric-Poisson and the pure Poisson approximations.

| Source of HCW infection | Proportion of within-host pairwise distances rejected at 5% level |         |
|-------------------------|-------------------------------------------------------------------|---------|
|                         | Geometric-Poisson                                                 | Poisson |
| Patients 1-6            | 0.16                                                              | 0.48    |
| Patients 7-14           | 0.25                                                              | 0.48    |
| Patients 15             | 0.35                                                              | 0.48    |

**Table S5.** Transmission routes excluded at the 5% level under a range of scenarios.

| Mutation rate | Eff. Pop. Size | HCW infection time (relative to first case) | HCW ruled out as patient source | Patients ruled out as HCW source |
|---------------|----------------|---------------------------------------------|---------------------------------|----------------------------------|
| 0.0002        | 3000           | -23                                         | NA                              | 8,9,10,13,14                     |
| 0.0005        | 3000           | -23                                         | NA                              | NA                               |
| 0.0002        | 10000          | -23                                         | NA                              | 8,9,10,13,14                     |
| 0.0002        | 100            | -23                                         | NA                              | 8,9,10,13,14                     |
| 0.0002        | 3000           | 164                                         | 1-10,13,14                      | –                                |
| 0.0002        | 3000           | -251                                        | NA                              | –                                |
