# Supplementary material
Source: PubMed Central journal article supplement (PMC4256759)
Supplement: 49e4478dcc248728681a3cac592a439b_genetics.114.171538-5.pdf [file 49e4478dcc248728681a3cac592a439b_genetics.114.171538-5.pdf]

**Table S5.** Transmission routes excluded at the 5% level under a range of scenarios.

| Mutation rate | Eff. Pop. Size | HCW infection time (relative to first case) | HCW ruled out as patient source | Patients ruled out as HCW source |
|---------------|----------------|---------------------------------------------|---------------------------------|----------------------------------|
| 0.0002        | 3000           | -23                                         | NA                              | 8,9,10,13,14                     |
| 0.0005        | 3000           | -23                                         | NA                              | NA                               |
| 0.0002        | 10000          | -23                                         | NA                              | 8,9,10,13,14                     |
| 0.0002        | 100            | -23                                         | NA                              | 8,9,10,13,14                     |
| 0.0002        | 3000           | 164                                         | 1-10,13,14                      | –                                |
| 0.0002        | 3000           | -251                                        | NA                              | –                                |
