# Supplementary material
Source: PubMed Central journal article supplement (PMC4256759)
Supplement: 137b25ec7fec1fa5a91ac97d38aa7112_genetics.114.171538-3.pdf [file 137b25ec7fec1fa5a91ac97d38aa7112_genetics.114.171538-3.pdf]

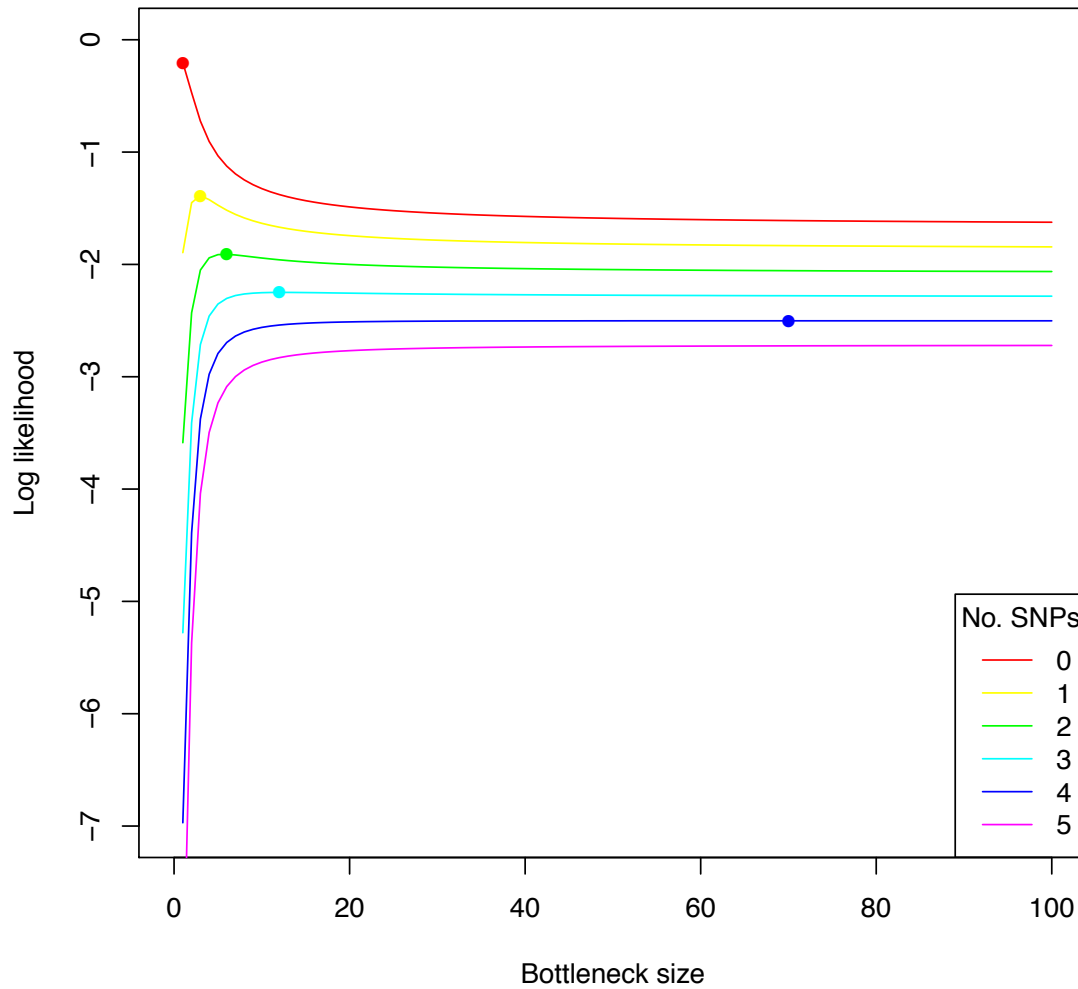

**Figure S9.** Likelihood curves for various within-host genetic distance observations, given a range of transmission bottleneck sizes. The effective population size and mutation rate are assumed to be known. The likelihood is calculated assuming samples are taken 50 generations after a transmission event; the maximum likelihood estimate of bottleneck size for each genetic distance is marked as a filled circle.
