# Supplementary material
Source: PubMed Central journal article supplement (PMC4256759)
Supplement: 372f367bf5725671d159efbbdcf2fa0f_genetics.114.171538-7.pdf [file 372f367bf5725671d159efbbdcf2fa0f_genetics.114.171538-7.pdf]

**Table S3.** Proportion of correct transmission routes identified using the geometric Poisson likelihood, as well as with the ‘outbreaker’ and ‘seqTrack’ functions. A total of 25 outbreaks with 30 susceptible individuals were simulated for each scenario, with outbreaks terminating with fewer than 20 infections excluded.  $R_0$  was set to be 2, with a within-population size 5000. In outbreaker, no spatial model was defined, importation identification was suppressed, and the infectivity distribution was specified to be uniform. In seqTrack, the mutation rate was provided.

<sup>a</sup> If the true source and other hosts are genetically equidistant, the true host is assumed to be identified with probability  $1/(\# \text{ equidistant closest hosts})$ .

| Parameters    |               | Network identification method |            |          |                               |
|---------------|---------------|-------------------------------|------------|----------|-------------------------------|
| Mutation rate | Inoculum size | ML estimate                   | outbreaker | seqTrack | Closest genotype <sup>a</sup> |
| 0.002         | 1             | 0.28                          | 0.20       | 0.14     | 0.21                          |
| 0.002         | 5             | 0.26                          | 0.19       | 0.13     | 0.17                          |
| 0.002         | 10            | 0.24                          | 0.19       | 0.14     | 0.16                          |
| 0.005         | 1             | 0.28                          | 0.20       | 0.13     | 0.22                          |
| 0.005         | 5             | 0.22                          | 0.18       | 0.12     | 0.18                          |
| 0.005         | 10            | 0.21                          | 0.21       | 0.13     | 0.17                          |
