# Supplementary material
Source: PubMed Central journal article supplement (PMC4256759)
Supplement: 867b05911049e6260f97355ed085fcaa_genetics.114.171538-11.pdf [file 867b05911049e6260f97355ed085fcaa_genetics.114.171538-11.pdf]

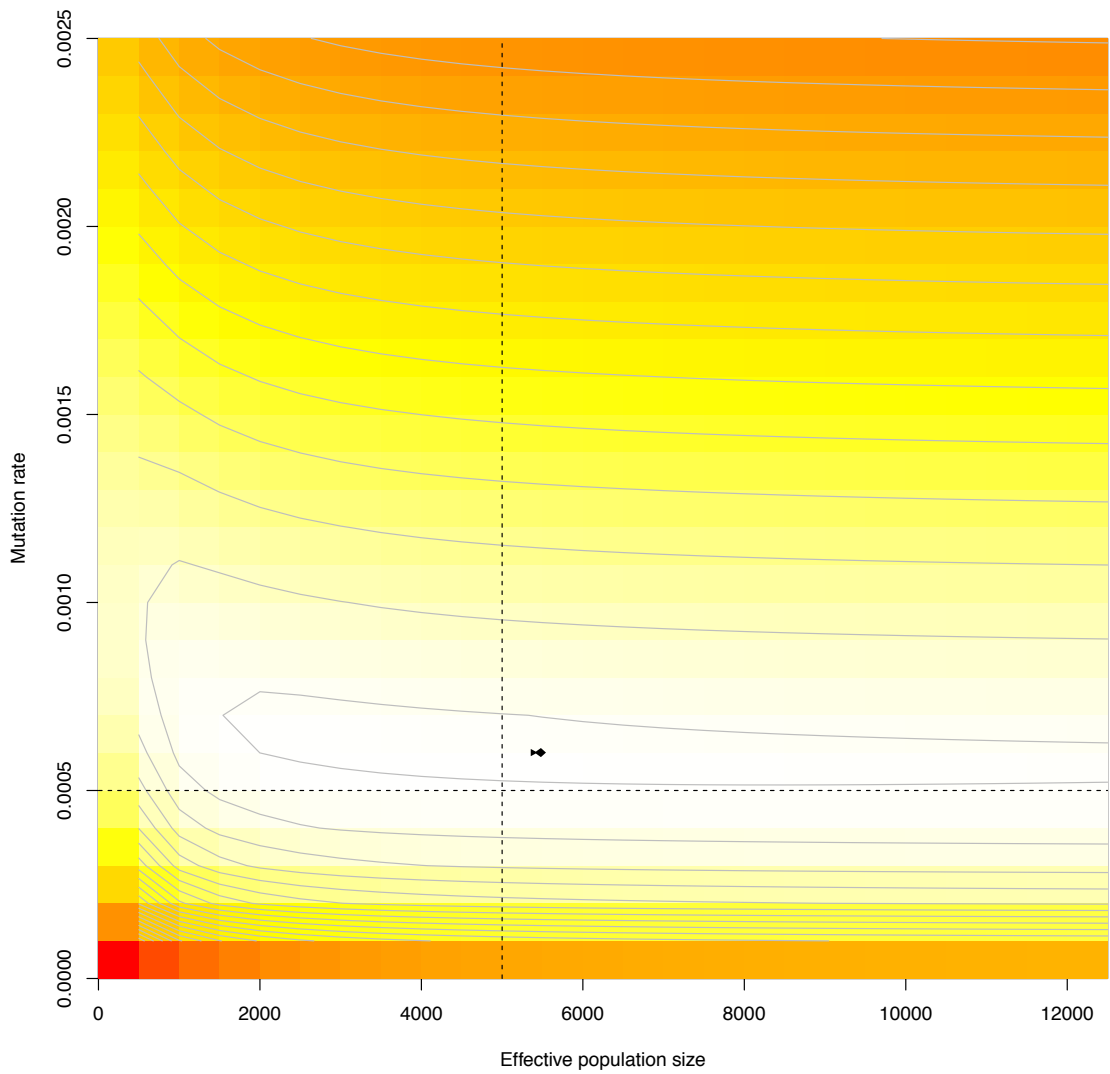

**Figure S8.** Likelihood of observing 28 pairwise genetic distances between known transmission pairs, given a range of values for the mutation rate and the effective population size. The dashed lines indicate parameter values under which the data were simulated, and the geometric-Poisson maximum likelihood value is marked. Maximum likelihood value calculated using the Nelder-Mead method in the ‘optim’ function in R.
