# Supplementary material
Source: PubMed Central journal article supplement (PMC4256759)
Supplement: 924dad576c1dcb054fb3d6197c0d6b62_genetics.114.171538-9.pdf [file 924dad576c1dcb054fb3d6197c0d6b62_genetics.114.171538-9.pdf]

## SI Tables

**Table S1.** The differences between approximated and empirical distributions for within-host genetic distances. For a range of  $\mu N_{eq}$  and times since clonal infection, Akaike's Information Criterion (AIC) is given for both the geometric-Poisson (GP) and the Poisson (P) approximation. 250 simulated pathogen populations were generated, and for each, 1000 pairwise distances were recorded at each of the sample times. Cells are shaded according to the lower AIC value – red for Poisson, green for geometric-Poisson. The mutation rate was 0.001 per genome per generation.

|                             |       | Effective population size, $N_{eq}$ |                         |                         |                          |                         |                         |
|-----------------------------|-------|-------------------------------------|-------------------------|-------------------------|--------------------------|-------------------------|-------------------------|
|                             |       | 500                                 | 1000                    | 2500                    | 5000                     | 7500                    | 10000                   |
| Time since clonal infection | 50    | GP: 75341<br>P: 75216               | GP: 80764<br>P: 80334   | GP: 80729<br>P: 80462   | GP: 80734<br>P: 80431    | GP: 78318<br>P: 78008   | GP: 84445<br>P: 84162   |
|                             | 100   | GP: 115043<br>P: 114067             | GP: 128371<br>P: 126955 | GP: 131869<br>P: 130751 | GP: 133561<br>P: 132260  | GP: 129586<br>P: 128358 | GP: 133905<br>P: 132656 |
|                             | 500   | GP: 258951<br>P: 257189             | GP: 297052<br>P: 291320 | GP: 323116<br>P: 310162 | GP: 343677<br>P: 324330  | GP: 336449<br>P: 319142 | GP: 340266<br>P: 322343 |
|                             | 1000  | GP: 324557<br>P: 336776             | GP: 384288<br>P: 386824 | GP: 442356<br>P: 421016 | GP: 455690<br>P: 421886  | GP: 459908<br>P: 422279 | GP: 464791<br>P: 424528 |
|                             | 2500  | GP: 340205<br>P: 360382             | GP: 455889<br>P: 499865 | GP: 559643<br>P: 591170 | GP: 616431<br>P: 602032  | GP: 640539<br>P: 601454 | GP: 648459<br>P: 583515 |
|                             | 5000  | GP: 355353<br>P: 384607             | GP: 470566<br>P: 555942 | GP: 629747<br>P: 772276 | GP: 730920<br>P: 844597  | GP: 758704<br>P: 821443 | GP: 781885<br>P: 804054 |
|                             | 7500  | GP: 351289<br>P: 384044             | GP: 489139<br>P: 599342 | GP: 656489<br>P: 870263 | GP: 755024<br>P: 994202  | GP: 785749<br>P: 986565 | GP: 801616<br>P: 947202 |
|                             | 10000 | GP: 349955<br>P: 380901             | GP: 477976<br>P: 567623 | GP: 655821<br>P: 898879 | GP: 708001<br>P: 1001501 | GP: 708912<br>P: 984256 | GP: 692577<br>P: 942683 |
