# Supplementary material
Source: PubMed Central journal article supplement (PMC4256759)
Supplement: cd737720a59a9c2c04f1ce95ed7a6337_genetics.114.171538-6.pdf [file cd737720a59a9c2c04f1ce95ed7a6337_genetics.114.171538-6.pdf]

### Inferred transmission network, including HCW

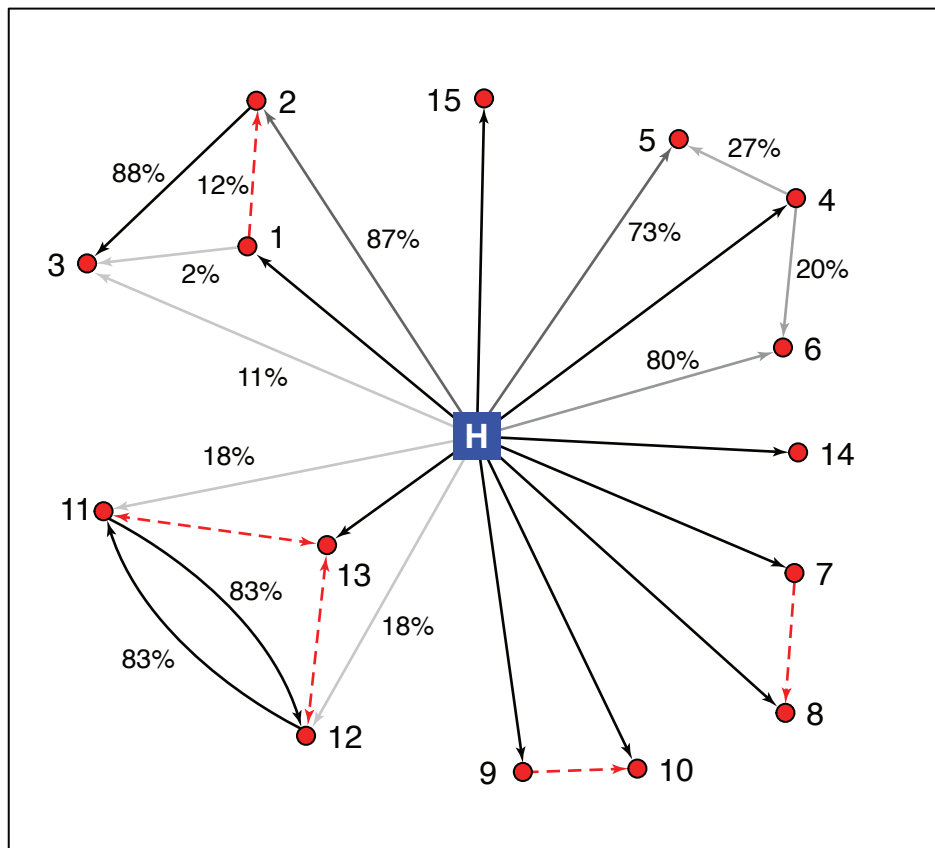

**Figure S5.** Transmission network in the SCBU, using the pure Poisson approximation. HCW is shown as a blue square, potential transmission routes are shown as arrows. Red dashed arrows denote transmission routes rejected at the 5% level using the Poisson approximation.
