# Supplementary material
Source: PubMed Central journal article supplement (PMC4256759)
Supplement: d1704651366704217721344b2600102d_genetics.114.171538-10.pdf [file d1704651366704217721344b2600102d_genetics.114.171538-10.pdf]

## SI Figures

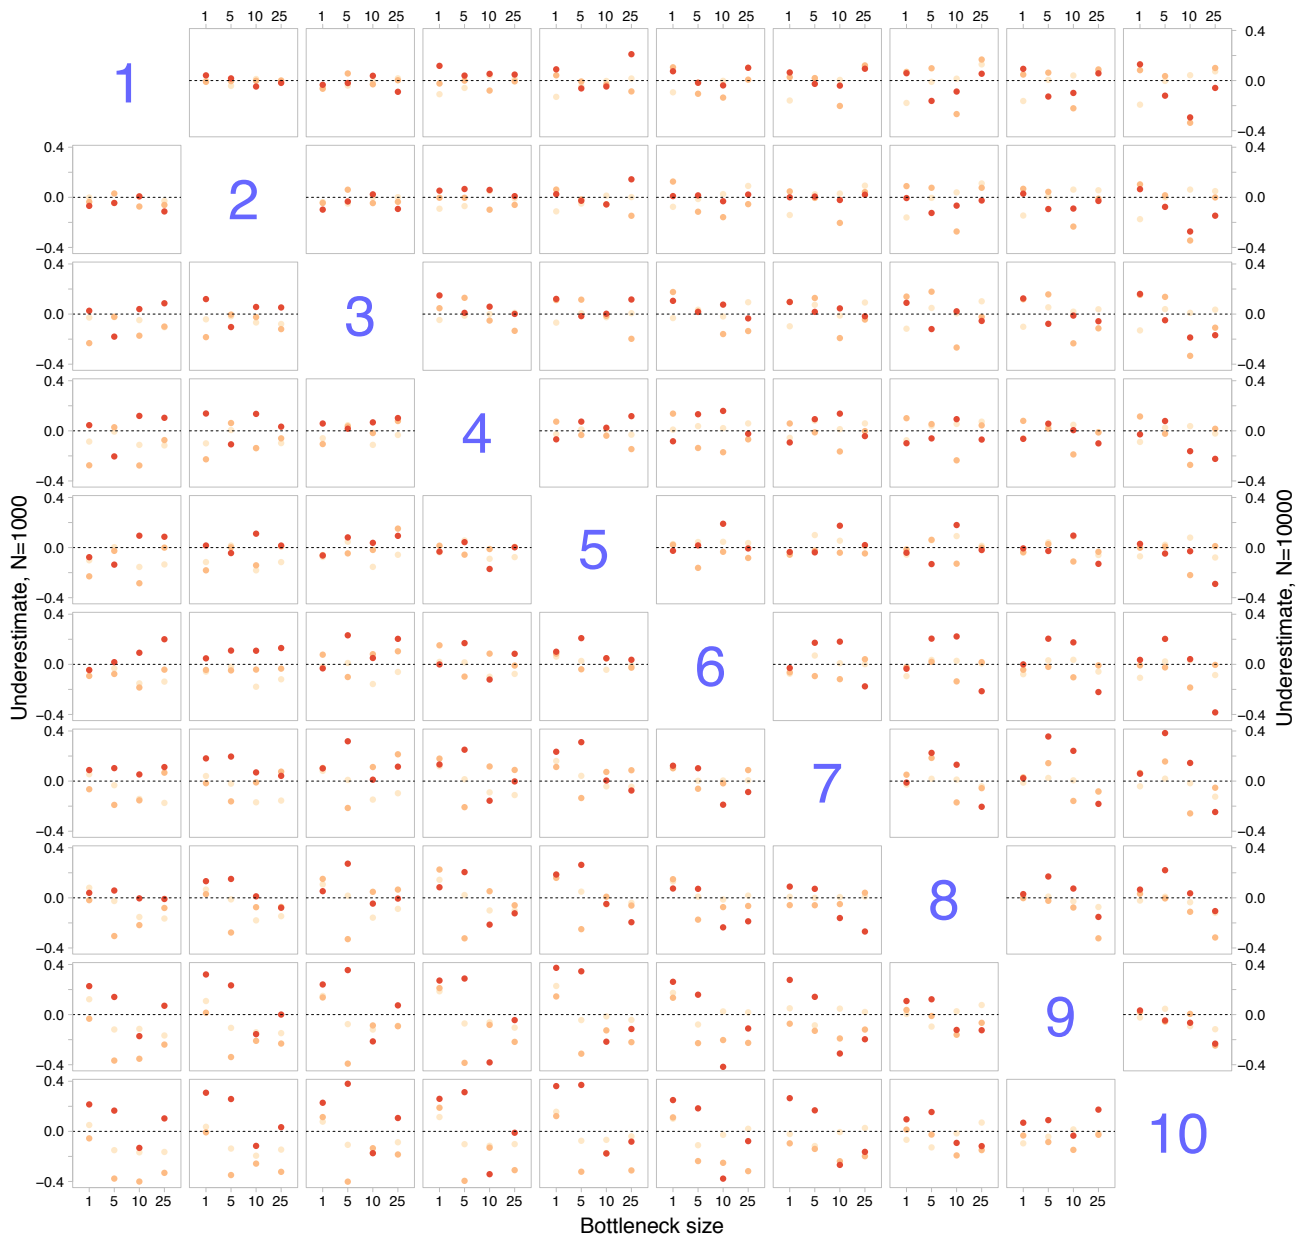

**Figure S1.** Differences between empirical and estimated pairwise genetic distances using the Geometric-Poisson approximation. The  $(i, j)$  th plot shows the difference between the empirical and simulated mean distance between samples taken from individuals  $i$  and  $j$ . Each plot shows the underestimate for various levels of bottleneck size and mutation rate (light, medium and dark points denote  $1 \times 10^{-4}$ ,  $3 \times 10^{-4}$ , and  $5 \times 10^{-4}$  respectively). Plots above the diagonal show underestimates for equilibrium population size 10000, while below the diagonal,  $N_{eq}=1000$ .
