# Supplementary material
Source: PubMed Central journal article supplement (PMC4256759)
Supplement: ec9bcdb441bd33092b12276c704e04ca_genetics.114.171538-12.pdf [file ec9bcdb441bd33092b12276c704e04ca_genetics.114.171538-12.pdf]

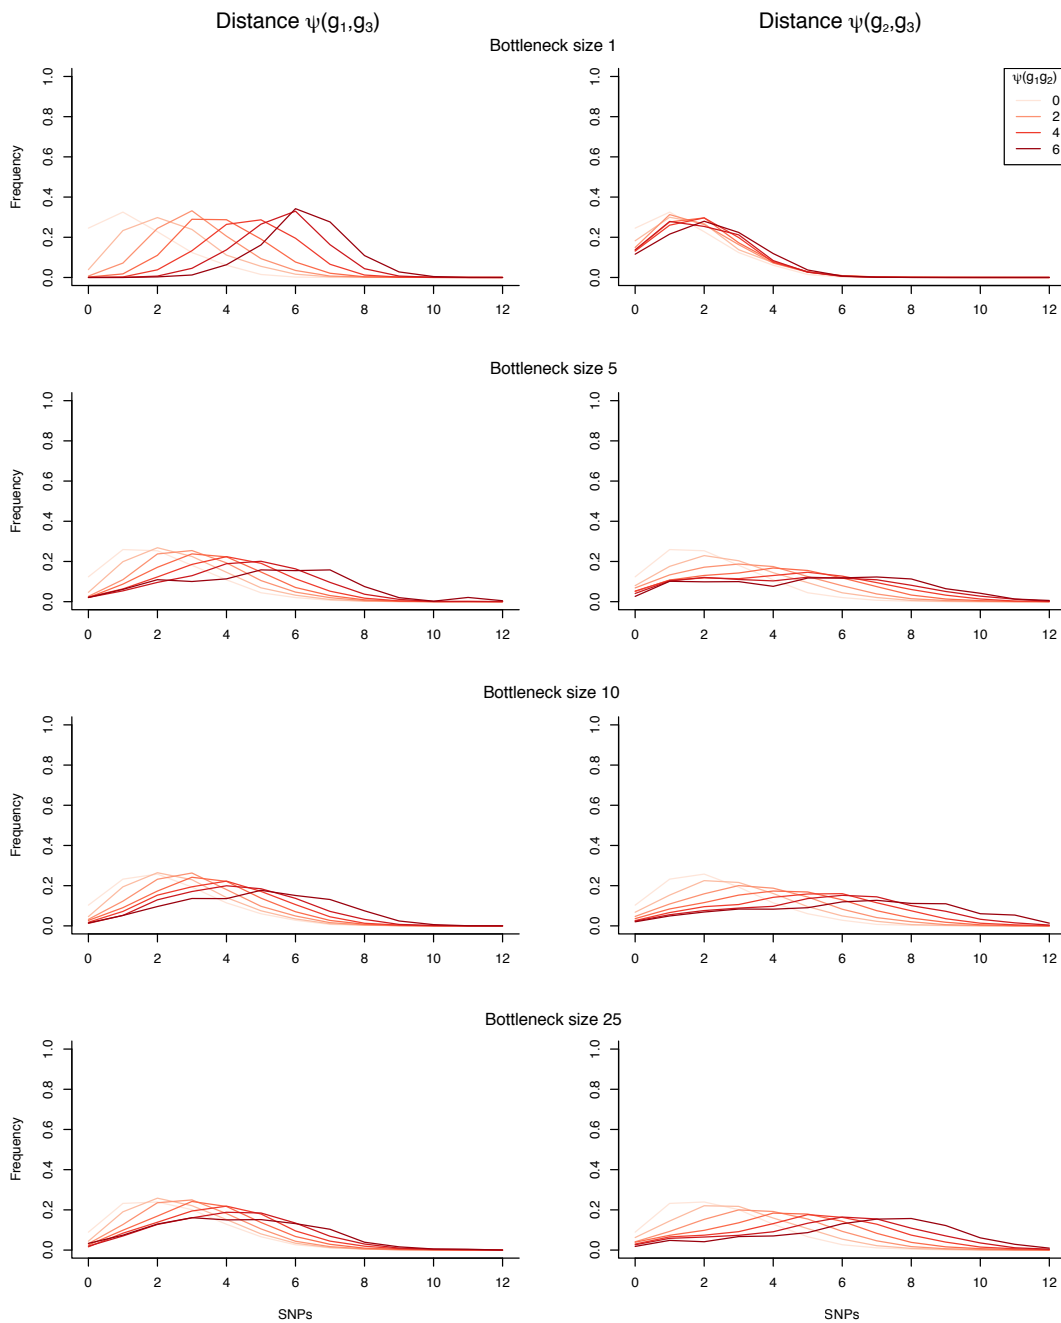

**Figure S6.** Simulated conditional distributions of genetic distances arising from a transmission chain of length 3. Each row shows plots for  $\psi(g_1, g_3)$  and  $\psi(g_2, g_3)$  given various levels of  $\psi(g_1, g_2)$  (denoted by different colors). Bottleneck size varies by row. Equilibrium size was set to 10000, and mutation rate  $\mu = 3 \times 10^{-4}$ .
