# Supplementary material
Source: PubMed Central journal article supplement (PMC4256759)
Supplement: f9a00ca55489f80c088e6c10ea606e61_genetics.114.171538-16.pdf [file f9a00ca55489f80c088e6c10ea606e61_genetics.114.171538-16.pdf]

**Table S2.** Proportion of true transmission routes identified by both maximum likelihood (ML) and genetic similarity. SIR outbreaks with 30 initial susceptibles were simulated and a single genome sample was generated for each infective. For scenarios with bottleneck size >1, it was assumed that transmission events prior to the infection of the source occurred at intervals equal to the mean generation interval. Simulations with a final size <20 were discarded. For each infective, the maximum likelihood source was calculated under the geometric-Poisson approximation, and the genetically closest hosts selected. Simulations for each scenario were repeated 100 times. Baseline parameters: infection rate 0.002, removal rate 0.001, effective population size 5000.

| Mutation rate ( $\times 10^{-4}$ )            | 1               |      |      | 3    |      |      | 5    |      |      |
|-----------------------------------------------|-----------------|------|------|------|------|------|------|------|------|
|                                               | Bottleneck size | 1    | 5    | 25   | 1    | 5    | 25   | 1    | 5    |
| Prop. routes identified by ML                 | 0.27            | 0.21 | 0.21 | 0.32 | 0.23 | 0.22 | 0.33 | 0.24 | 0.21 |
| Prop. routes identified by genetic similarity | 0.19            | 0.17 | 0.15 | 0.27 | 0.20 | 0.18 | 0.29 | 0.22 | 0.19 |
