# Supplementary material
Source: PubMed Central journal article supplement (PMC4256759)
Supplement: ff729afd571954d83719a7dbcf4c2dd2_genetics.114.171538-15.pdf [file ff729afd571954d83719a7dbcf4c2dd2_genetics.114.171538-15.pdf]

## Inferred transmission network, including HCW

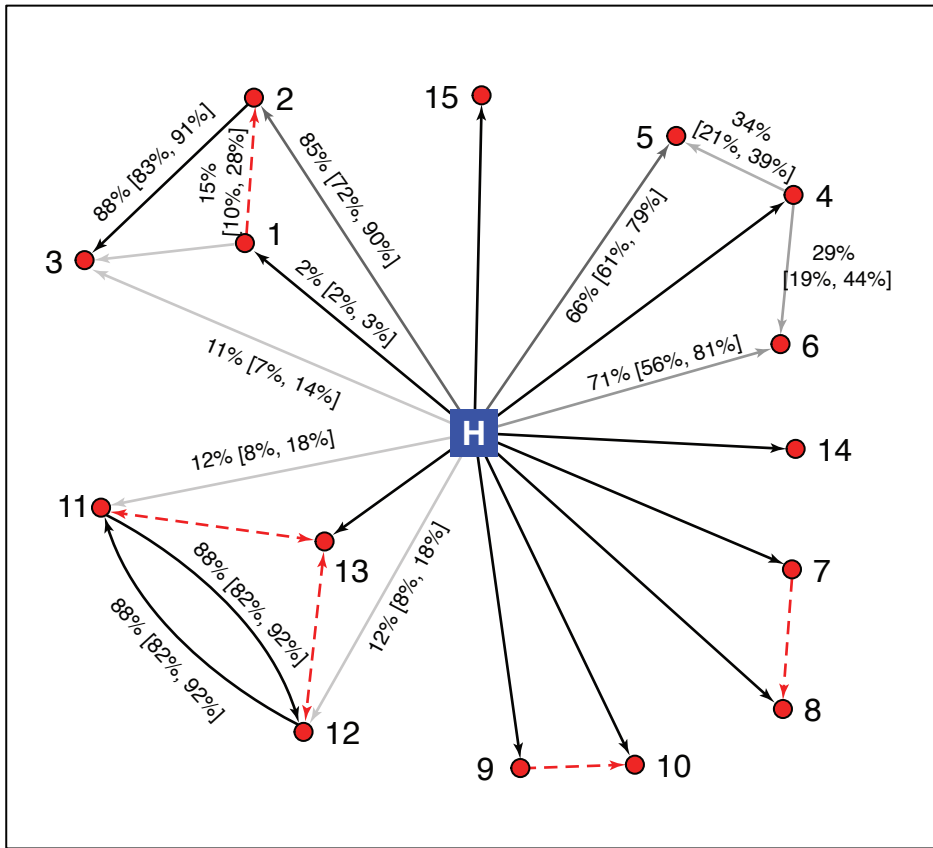

**Figure S4.** Transmission network in the SCBU, using each HCW isolate individually. HCW is shown as a blue square, potential transmission routes are shown as arrows. Red dashed arrows denote transmission routes rejected at the 5% level using the geometric-Poisson approximation. For each of the 20 HCW isolates, posterior transmission probabilities were calculated individually, and the mean and range of values are indicated on the plot.
